# Supplementary material for: Cis- and trans-acting variants contribute to survivorship in a naïve Drosophila melanogaster population exposed to ryanoid insecticides
Source: PubMed Central journal article supplement — Proc Natl Acad Sci U S A. 2019 May 7;116(21):10424–9. doi: 10.1073/pnas.1821713116 (PMC6535026; doi:10.1073/pnas.1821713116), 2019-05-07

## Supplementary Information for

*Cis* and *trans*-acting variants contribute to survivorship in a naïve *Drosophila melanogaster* population exposed to ryanoid insecticides

Llewellyn Green, Paul Battlay, Alexandre Fournier-Level, Robert T. Good, Charles Robin

Corresponding author: Charles Robin

Email: [crobin@unimelb.edu.au](mailto:crobin@unimelb.edu.au)

### **This PDF file includes:**

Figs. S1 to S4

### **Other supplementary materials for this manuscript include the following:**

Datasets S1 to S15

## Supplementary figures

**Figure S1.** Chlorantraniliprole phenotypes of 152 DGRP lines. (A)  $LC_{50}$ , calculated from a minimum of six Abbott-corrected concentration survivorship phenotypes. (B) The survivorship of each line on the different concentrations (coloured), ordered by  $LC_{50}$ .

**Figure S2.** The explanatory power of phenotype-associated DGRP variants for each chlorantraniliprole concentration compared to the number of associated variants. (A) the number of variants that cross the GWAS significance threshold for each concentration. (B) The explanatory power of 5, 10, 25 and 50 variants for each concentration using genomic prediction. This shows that more genes are required to explain the genetic architecture of the lowest concentration. For example, if the top 50 most-associated variants of the 0.5  $\mu\text{g/mL}$  concentration are considered they explain about the same amount of the phenotypic variation ( $R=0.43$ ) as the top 5 variants of the 5  $\mu\text{g/mL}$  concentration.

**Figure S3.** q-q plot showing that correction of the  $LC_{50}$  phenotype for the effect of *Strn-Mlck* (blue) decreases the  $p$ -value inflation substantially but does not return the observed GWAS  $p$ -values (black) to expected levels (red).

**Figure S4.** R spider networks of GWAS candidates ( $p < 1 \times 10^{-5}$ ) from  $LC_{50}$  (A) and *Strn-Mlck*-corrected  $LC_{50}$  phenotypes (B). GWAS candidates are annotated with minimum  $p$ -value (black), maximum MAF (red) and maximum effect size (blue).

## Supplementary file

**Files S1-S7.** Individual DGRP line values for six single-concentration chlorantraniliprole phenotypes and  $LC_{50}$ .

**Files S8-S14.** Raw Mackay Lab DGRP2 pipeline top candidate outputs for six single-concentration chlorantraniliprole phenotypes and  $LC_{50}$ .

**File S15.**  $LC_{50}$  phenotype to transcriptome Bonferroni-significant associations.

**Figure S1**

**A**

**Chlorantraniliprole LC<sub>50</sub>**

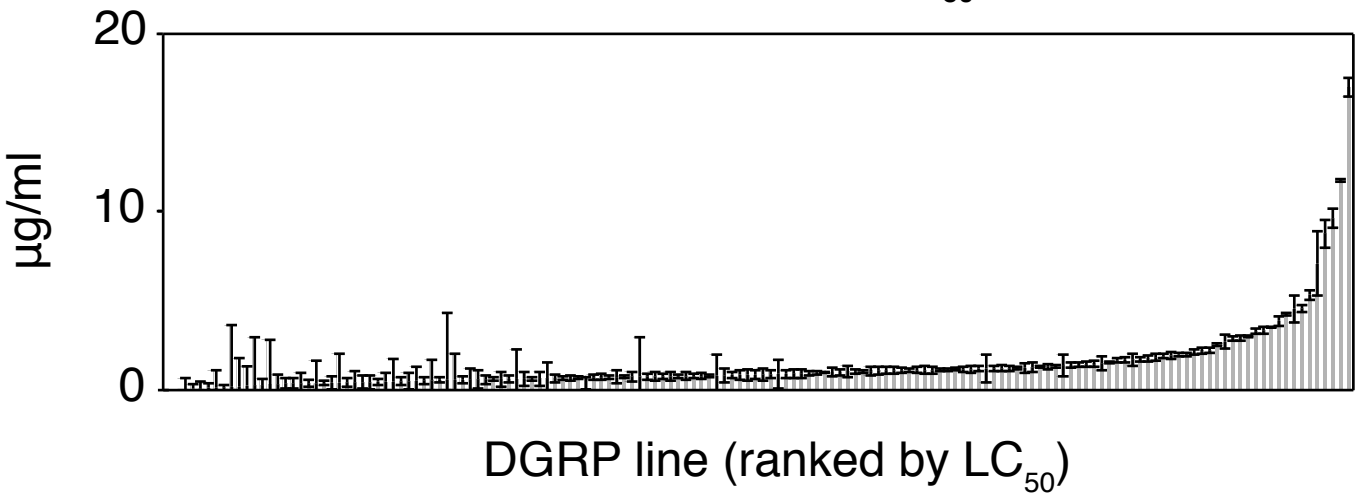

**B**

**Chlorantraniliprole concentration response**

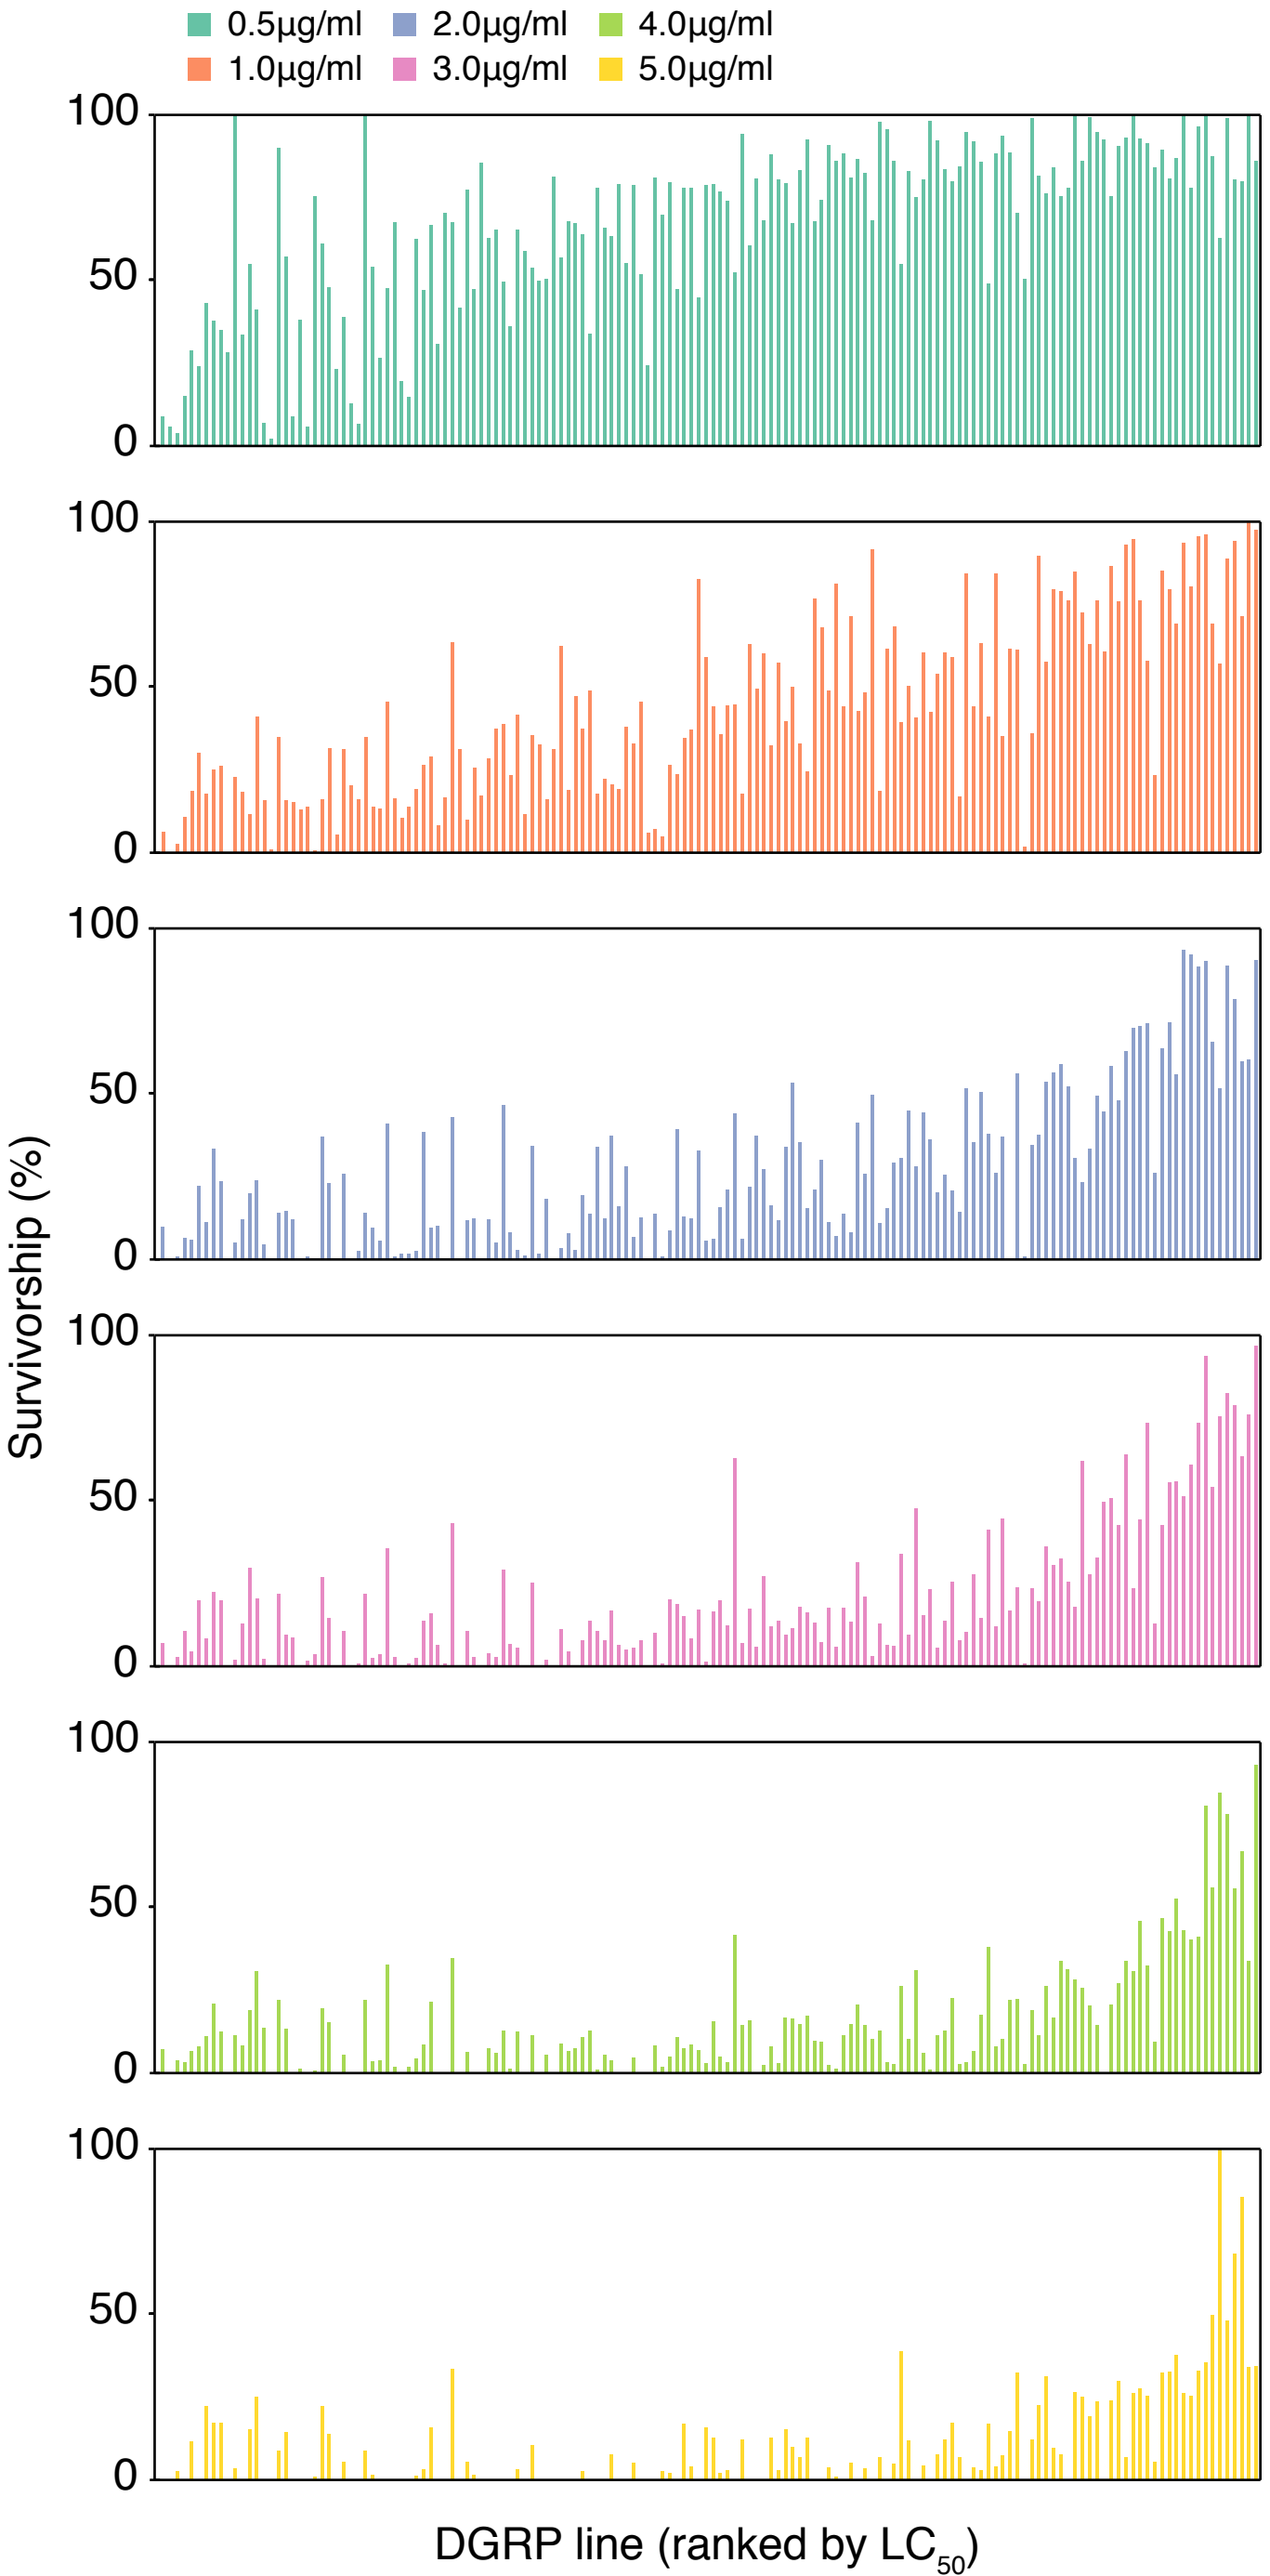

**Figure S2**

**A Associations with concentration phenotypes**

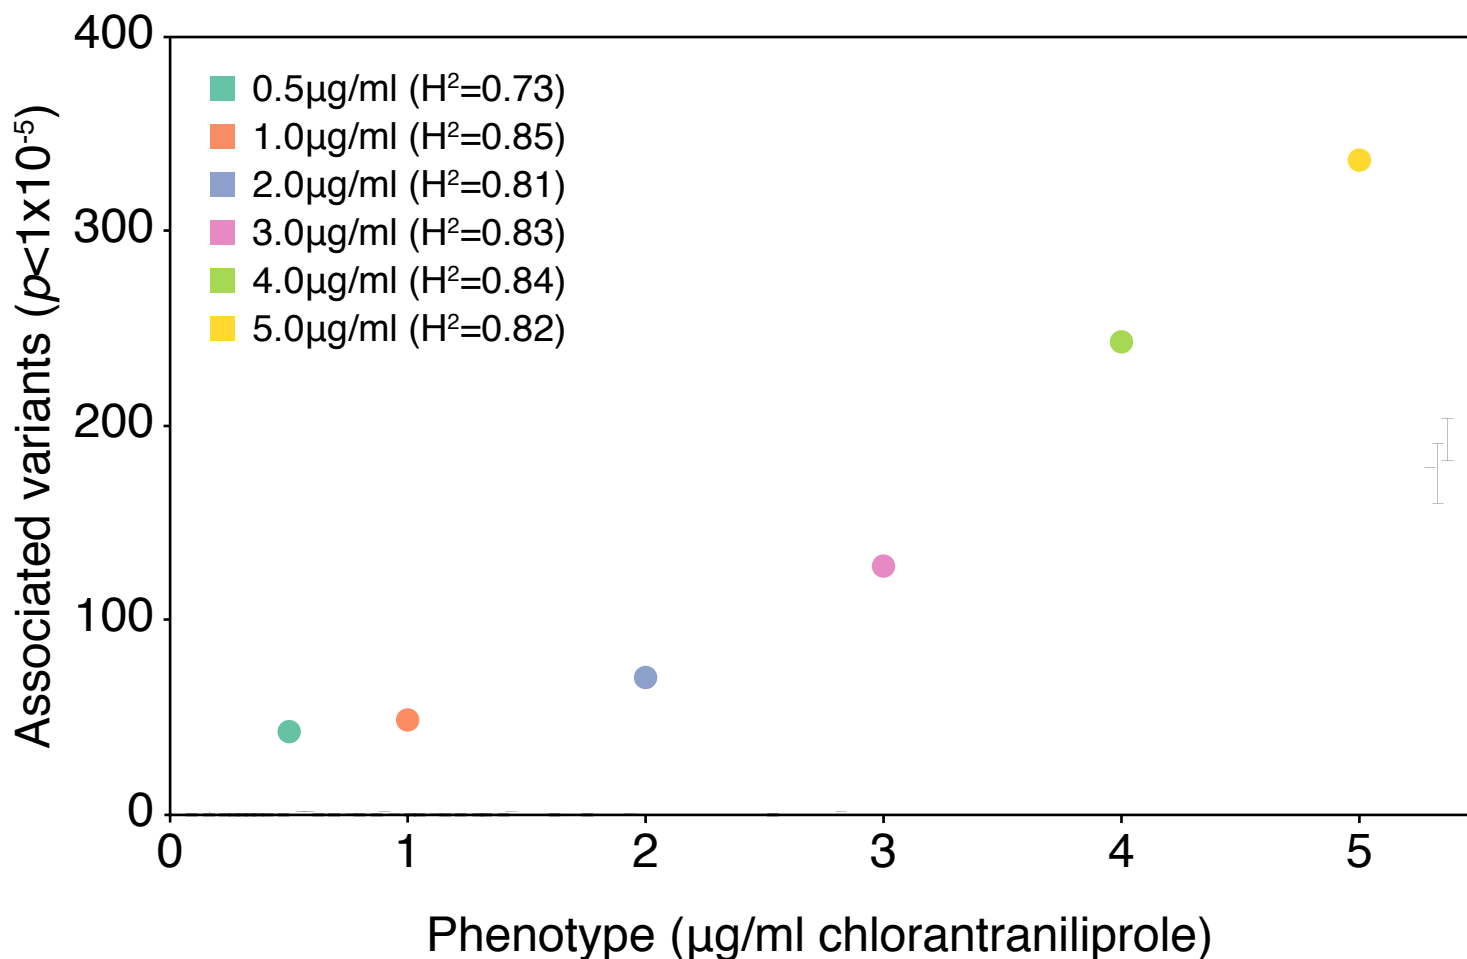

**B Explanatory power of associated variants**

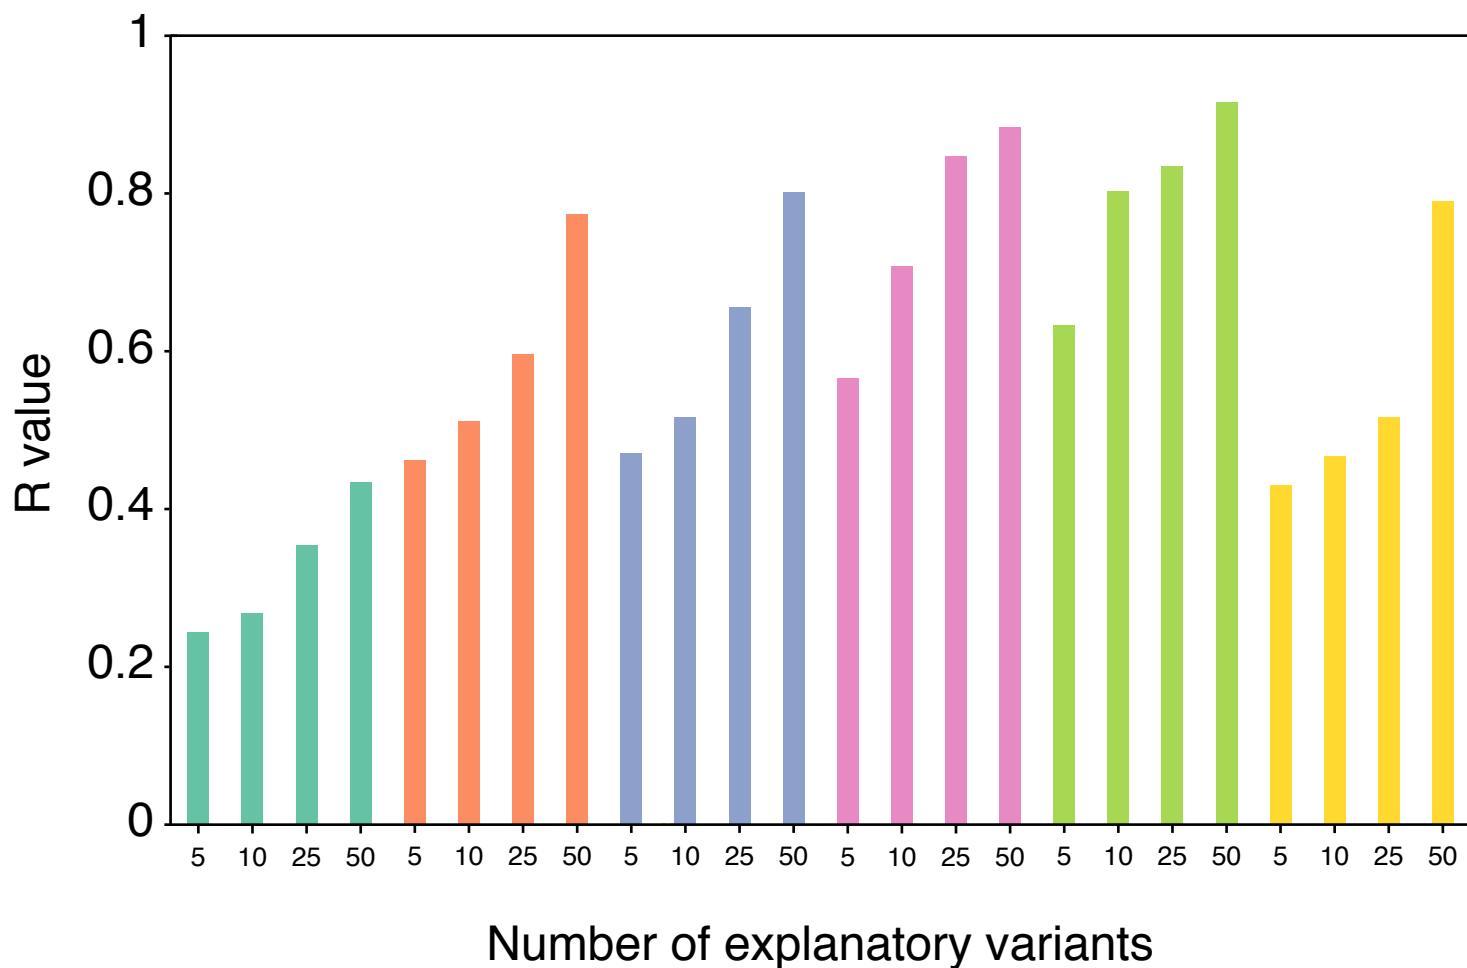

**Figure S3**

**Uncorrected and corrected GWAS q-q plots**

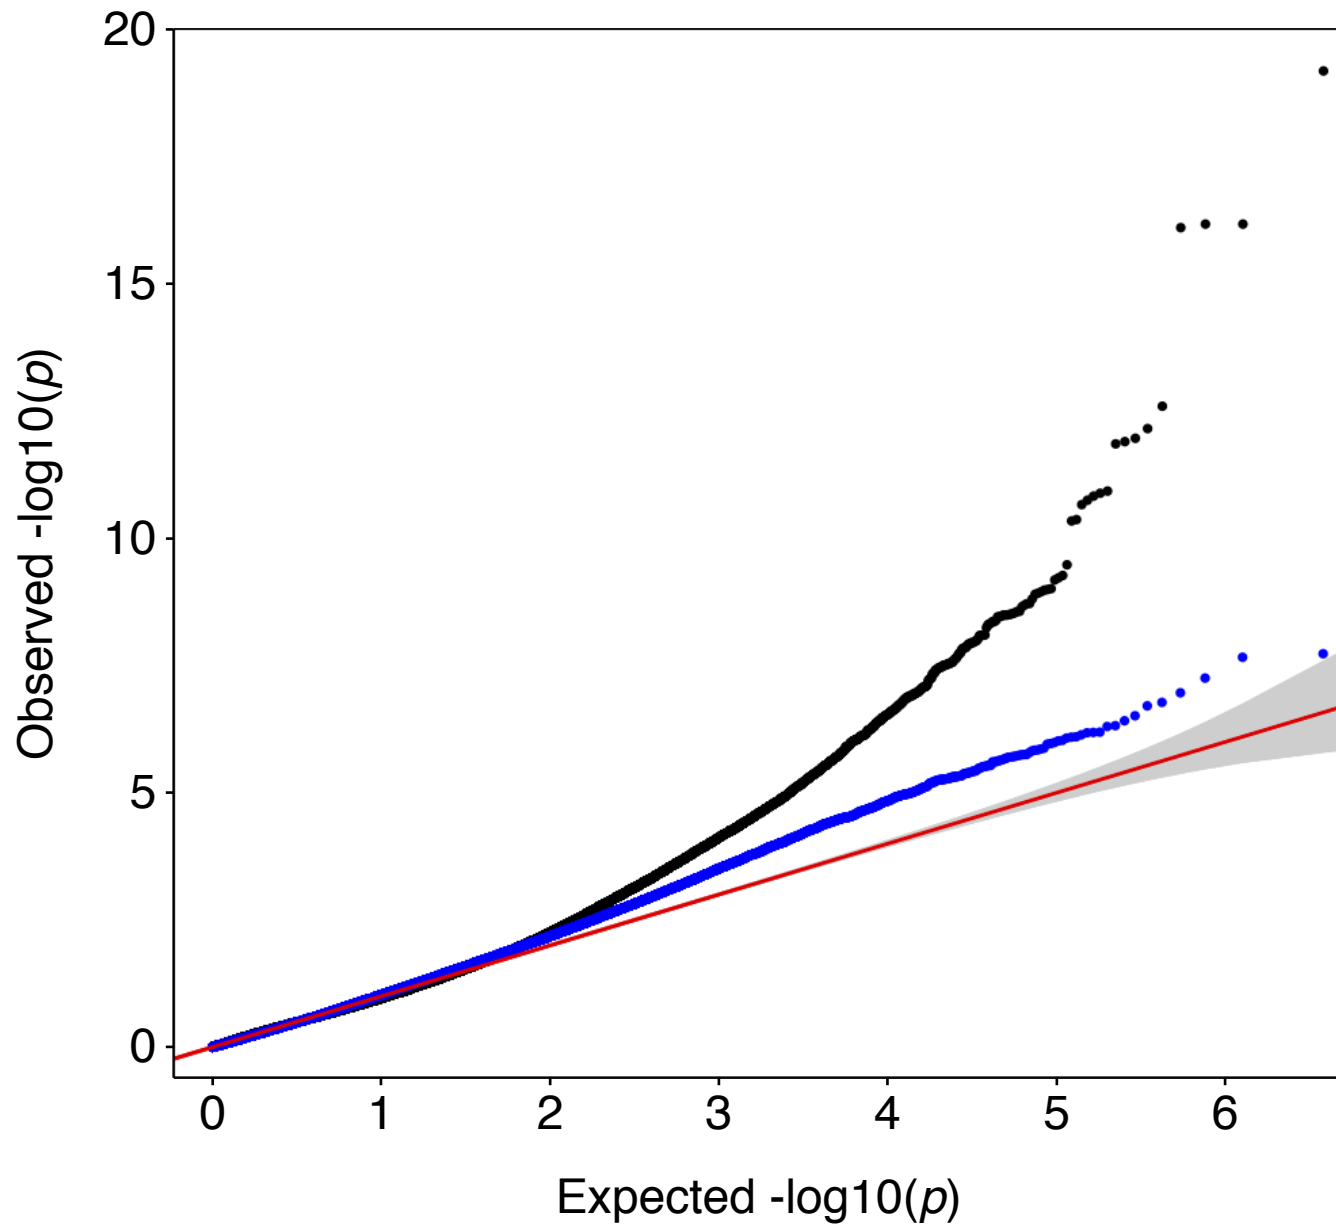

Figure S4

A

### GWAS candidate R spider network

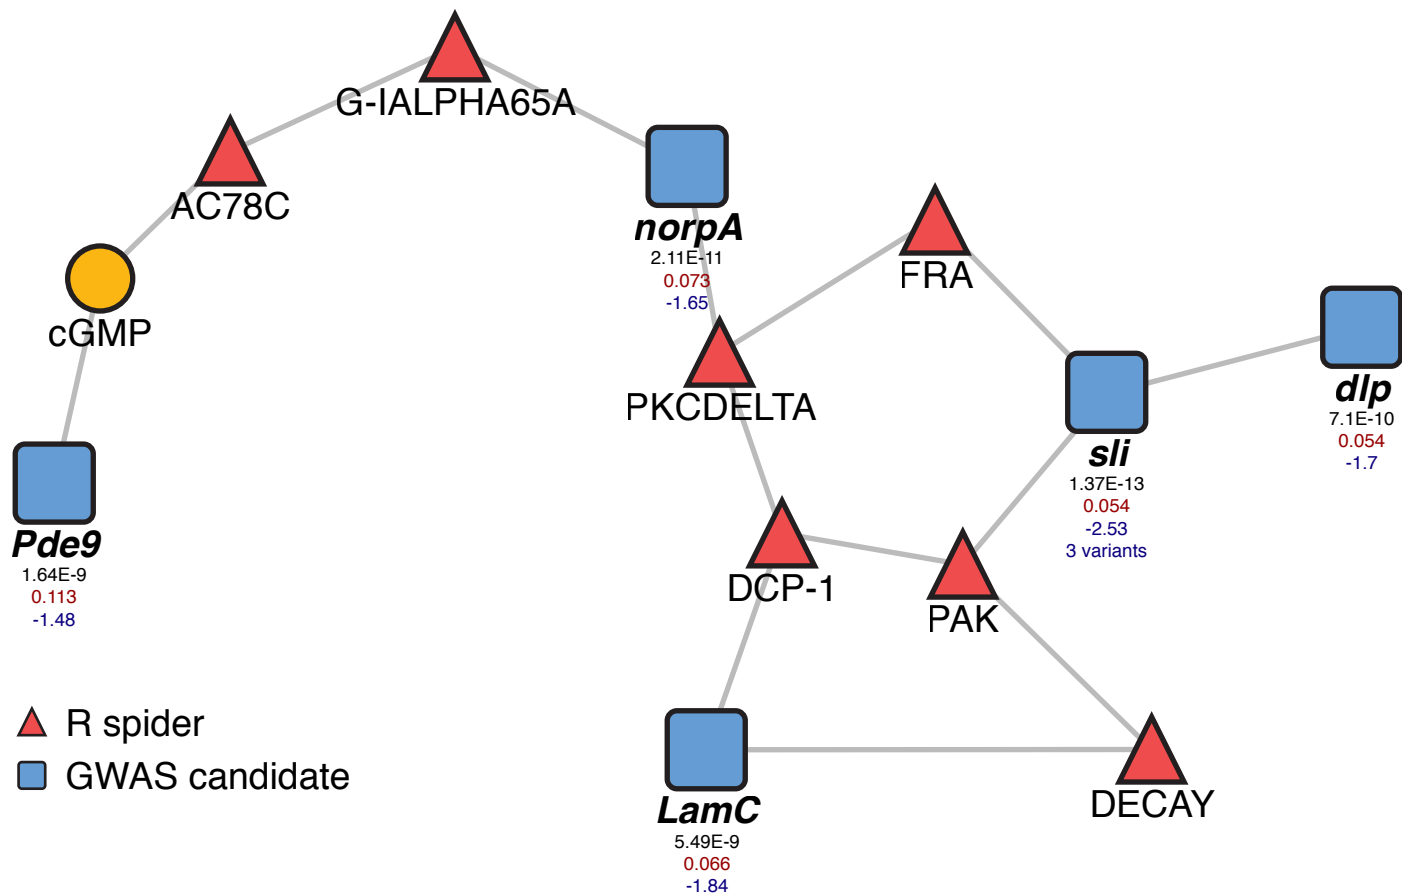

B

### Corrected GWAS candidate R spider network

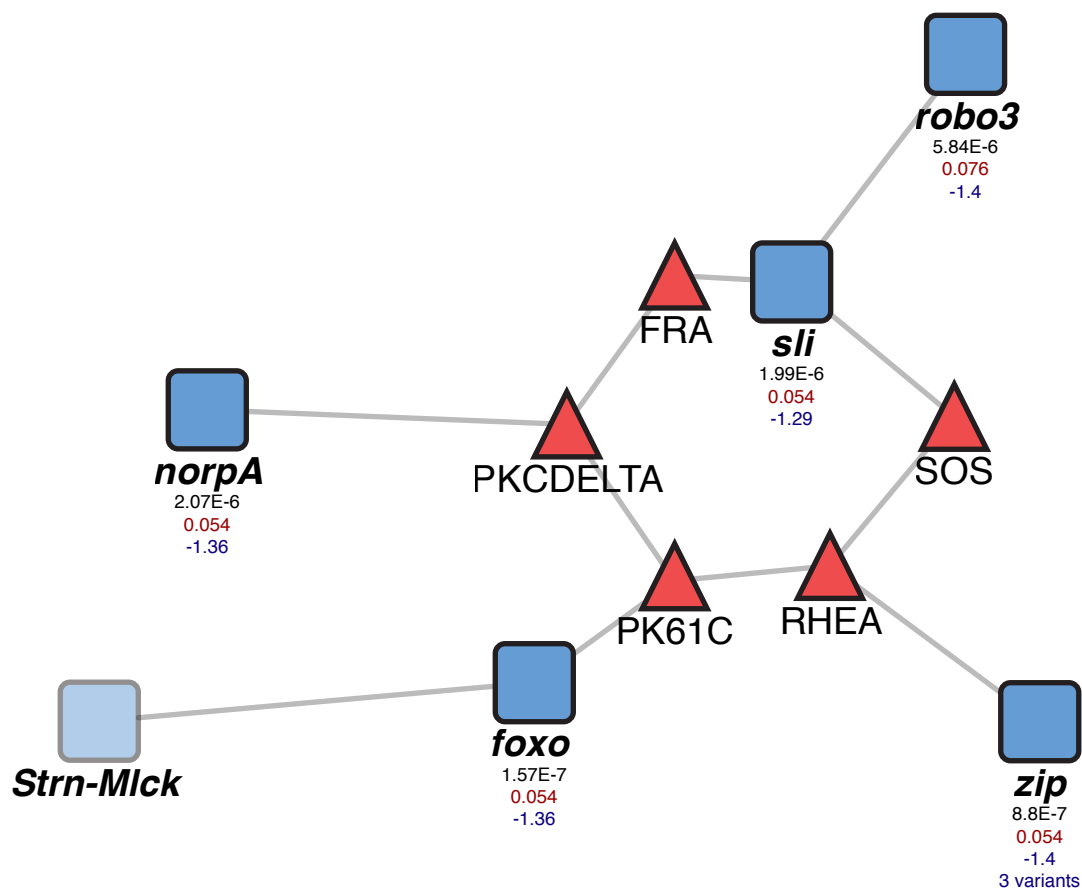

Supplement: pnas.1821713116.sapp.pdf [file pnas.1821713116.sapp.pdf]
